# Supplementary material
Source: publisher figshare collection journal article supplement (https://sage.figshare.com/ndownloader/files/17785412)
Supplement: Supplementary file 1 [file 17785412]

Reviewer 2 v2

Comments to the Author

My concerns have been responded well.
